# Supplementary material for: Faceted Cu2O structures with enhanced Li-ion battery anode performances
Source: Royal Society of Chemistry journal article supplement (doi:10.1039/c4ce02340d), 2015-01-01
Supplement: c4ce02340d1.pdf [file c4ce02340d1.pdf]

## **Supporting Information**

### **Faceted Cu<sub>2</sub>O structures with enhancing Li-ion battery anode performances**

Kunfeng Chen, Shuyan Song\* and Dongfeng Xue\*

State Key Laboratory of Rare Earth Resource Utilization, Changchun Institute of Applied Chemistry, Chinese Academy of Sciences, Changchun 130022, China

\*Corresponding author: E-mail: [songsy@ciac.ac.cn](mailto:songsy@ciac.ac.cn); [dongfeng@ciac.ac.cn](mailto:dongfeng@ciac.ac.cn).

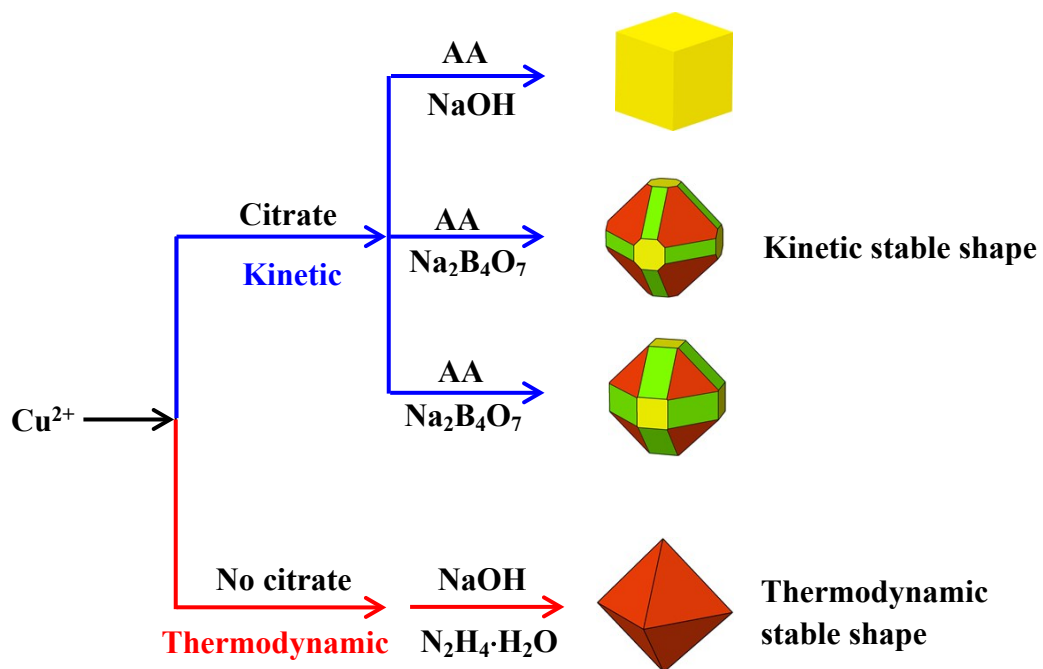

Figure S1 Schematic illustration of chemical reaction and crystallization process based on reduction synthesis of  $\text{Cu}_2\text{O}$  polyhedra from  $\text{Cu}^{2+}$ .

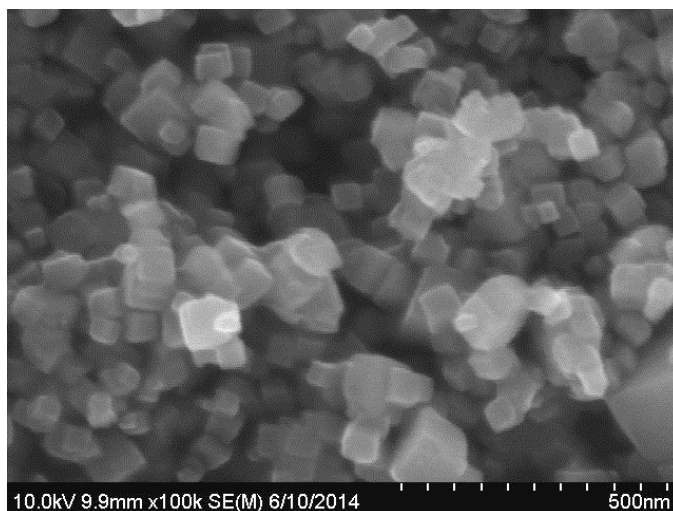

Figure S2 SEM images of  $\text{Cu}_2\text{O}$  cubes synthesized without using citrate.

The synthesis method: 0.5 mmol  $\text{CuSO}_4$  and 2 mmol  $\text{NaOH}$  were dissolved in 14 ml water. Then, 6 ml ascorbic acid (AA, 0.1 M) was added to above solution with stirring. After reaction of about 2-3 h, yellow precipitates were filtered and dried at 50 °C for further characterization.

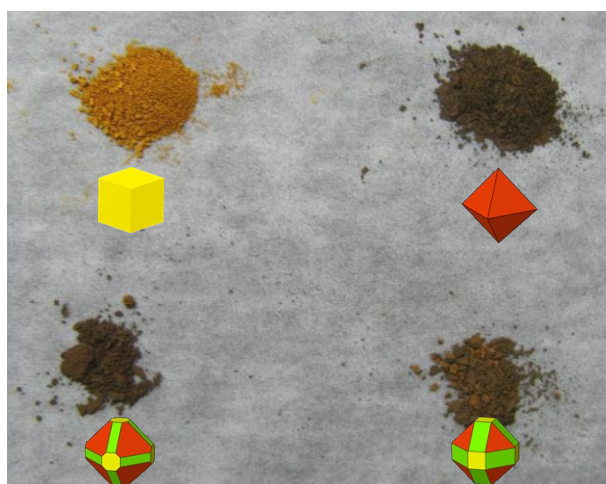

Figure S3 The digital images of the obtained  $\text{Cu}_2\text{O}$  polyhedra.

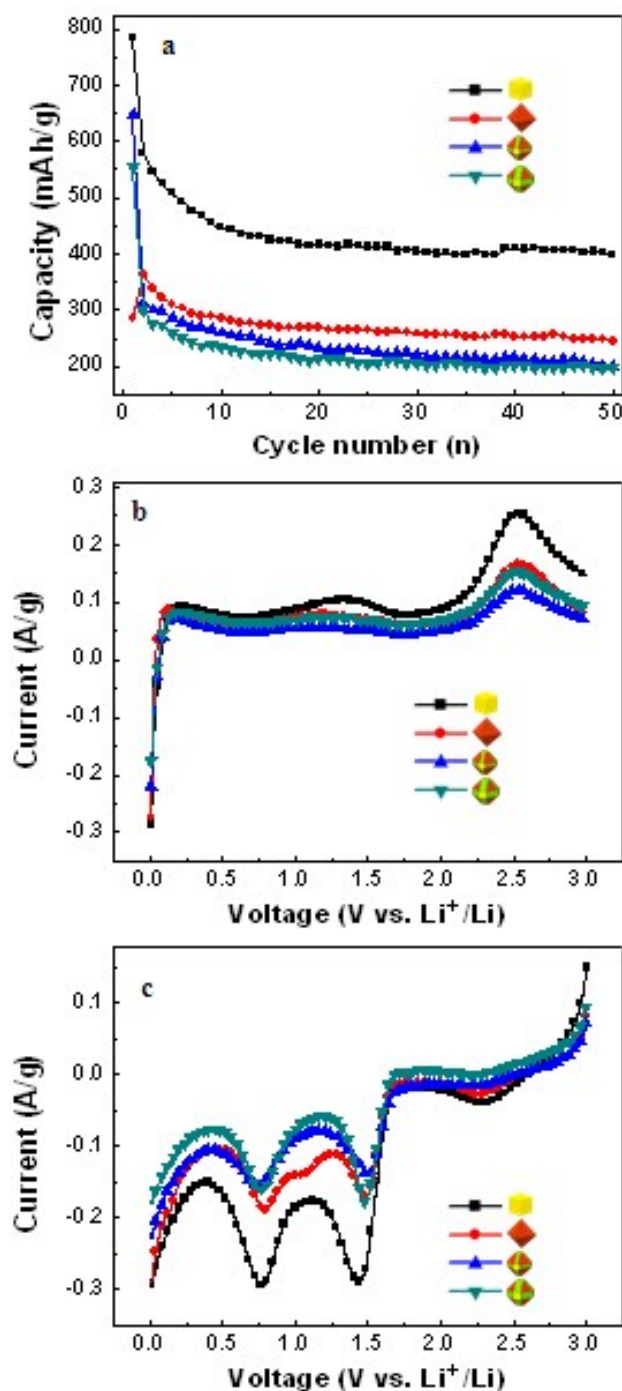

Figure S4 Cycling performance (a) and CV curves (b, c) of Cu<sub>2</sub>O with different morphologies: cube, octahedron and truncated octahedron with different degree of {110} facets. Comparison of reduction peak (b) and oxidation peaks (c). Cycling stability of Cu<sub>2</sub>O anodes obtained at current rate of 100mA/g. CV curves obtained at the scan rate of 0.3 mV/s and potential range of 0.01-3.0V vs. Li<sup>+</sup>/Li, which were measured after 50 discharge-charge cycles.

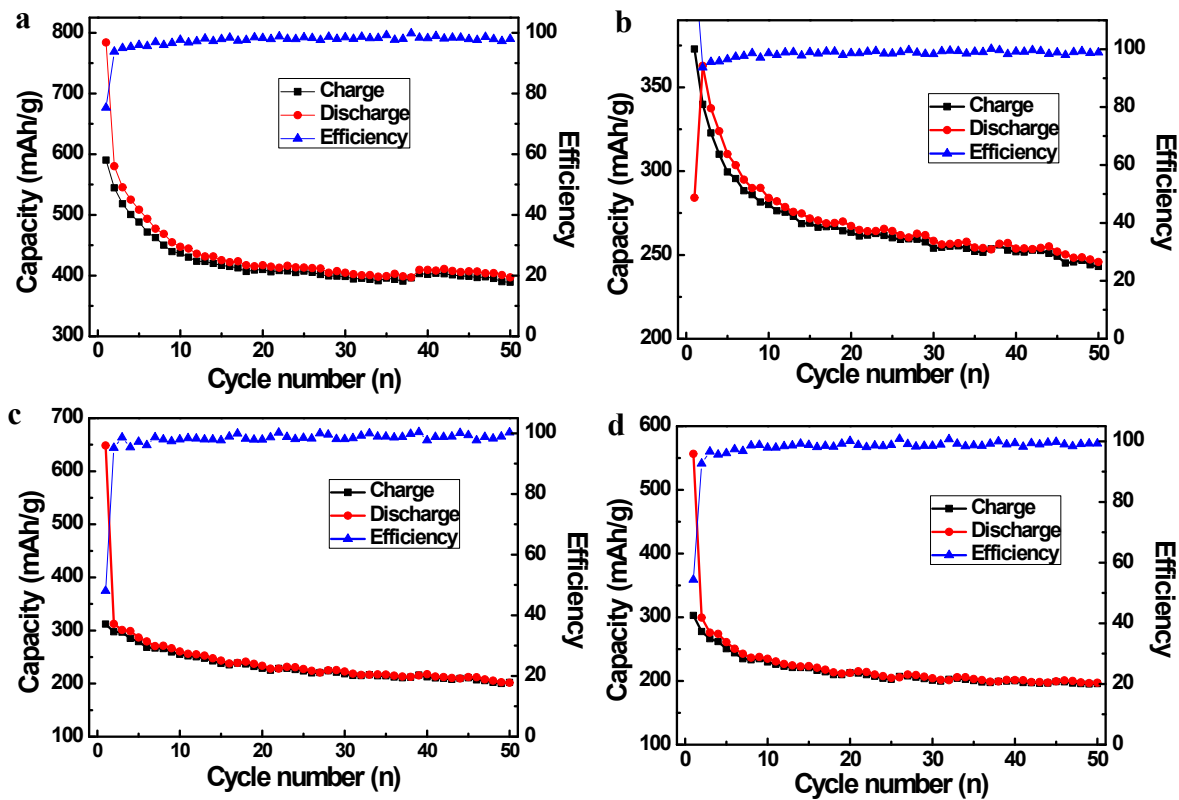

Figure S5 Cycling performance curves of  $\text{Cu}_2\text{O}$  anodes with different morphologies. (a) cube, (b) octahedron, (c) truncated octahedron with exposing small area of {110} planes, and (d) truncated octahedron with exposing large area of {110} planes. Cycling curves of  $\text{Cu}_2\text{O}$  anodes obtained at current rate of 100 mA/g and the potential range of 0.01-3.0 V vs.  $\text{Li}^+/\text{Li}$ .

Table S1 Morphologies and sizes of Cu<sub>2</sub>O materials and their lithium ion battery anode performances. 1C = 674 mA/g

| Morphology               | Size /nm | Reagent                                                         | 1st<br>capacity/mAhg <sup>-1</sup> | Capacity/mAhg <sup>-1</sup><br>(rate/cycle number) | Ref.      |
|--------------------------|----------|-----------------------------------------------------------------|------------------------------------|----------------------------------------------------|-----------|
| Cube                     | 50-55    | CuSO <sub>4</sub> +NaOH+cit+AA                                  | 550                                | 140 (1C/50 cycles)                                 | 1         |
| Cube                     | 65-70    | CuSO <sub>4</sub> +NaOH+cit+AA                                  | 560                                | 160 (1C/50 cycles)                                 | 1         |
| Cube                     | 75-80    | CuSO <sub>4</sub> +NaOH+cit+AA                                  | 610                                | 236 (1C/50 cycles)                                 | 2         |
| Cube                     | 1-2μm    | CuSO <sub>4</sub> +Na <sub>2</sub> CO <sub>3</sub> +cit+glucose | 600                                | 390 (0.2C/50 cycles)                               | 2         |
| Octahedron               | 41±7     | Cu(II)ace+ODA+ODE                                               | 280                                | 110 (1mA/50 cycles)                                | 3         |
| Octahedron               | 500-1000 | CuSO <sub>4</sub> +NaOH+N <sub>2</sub> H <sub>4</sub>           | 476                                | 87 (100 mAg <sup>-1</sup> /50 cycles)              | 4         |
| Octahedron               | 100-150  | CuAc <sub>2</sub> +N <sub>2</sub> H <sub>4</sub>                | 700                                | 43 (100 mAg <sup>-1</sup> /50 cycles)              | 5         |
| 26-faceted<br>polyhedron | 1μm      | CuCl <sub>2</sub> +NaOH+glucose+SDS<br>+CTAOH                   | 600                                | 105 (80 mAg <sup>-1</sup> /50 cycles)              | 6         |
| Cube                     | ~100nm   | CuSO <sub>4</sub> + cit + NaOH +AA                              | 784                                | 397 (100 mAg <sup>-1</sup> /50 cycles)             | This work |

RT=room temperature, cit=trisodium citrate, AA=ascorbic acid, ace=acetylacetonate, ODA= octadecylamine, ODE=1-octadecene.

- 1 I. Chang, P. Chen, M. Tsai, T. Chen, M. Yang, H. Chiu and C. Lee, *CrystEngComm*, 2013, **15**, 2363–2366.
- 2 C. Q. Zhang, J. P. Tu, X. H. Huang, Y. F. Yuan, X. T. Chen, F. Mao, *J. Alloys Compounds*, 2007, **441**, 52–56.
- 3 A. Paolella, R. Brescia, M. Prato, M. Povia, S. Marras, L. De Trizio, A. Falqui, L. Manna, and C. George, *ACS Appl. Mater. Interfaces*, 2013, **5**, 2745–2751.
- 4 K. Chen and D. Xue, *CrystEngComm*, 2013, **15**, 1739–1746.
- 5 K. Chen, S. Song and D. Xue. *CrystEngComm*, 2013, **15**, 10028–10033.
- 6 W. Kang, F. Liu, Y. Su, D. Wang and Q. Shen, *CrystEngComm*, 2011, **13**, 4174–4180.
